# Supplementary material
Source: MDPI journal article supplement (https://www.mdpi.com/2311-5637/8/7/324)
Supplement: s1 [file s1]

**Table S1.** DNA sequencing results of bacteria not belonging to the acetic acid bacteria groups during winter, véraison and harvest.

| Season   | Species                              | Vineyard soil | Vineyard insects | Tree bark close to vineyard | Vine bark | Vine leaf | Insect far from vineyard | Tree far from winery | Healthy berry | Enriched must |
|----------|--------------------------------------|---------------|------------------|-----------------------------|-----------|-----------|--------------------------|----------------------|---------------|---------------|
| Winter   | <i>Chryseobacterium sp</i>           |               |                  | 1                           |           |           |                          |                      |               |               |
|          | <i>Ensifer adhaerens</i>             | 1             |                  |                             |           |           |                          |                      |               |               |
|          | <i>Flavobacterium pectinovorum</i>   | 1             |                  |                             |           |           |                          |                      |               |               |
|          | <i>Pantoea spp.</i>                  |               |                  | 1                           |           |           |                          |                      |               |               |
|          | <i>Pseudomonas spp.</i>              |               | 1                |                             |           |           |                          |                      |               |               |
|          | <i>Serratia marcescens</i>           |               | 2                |                             |           |           |                          |                      |               |               |
|          | <i>Stenotrophomonas chelatiphaga</i> |               |                  | 1                           |           |           |                          |                      |               |               |
| Véraison | <i>Acinetobacter calcoaceticus</i>   | 1             |                  |                             |           |           |                          |                      |               |               |
|          | <i>Cronobacter pulveris</i>          |               |                  |                             | 1         |           |                          |                      |               |               |
|          | <i>Enterobacter spp.</i>             | 1             |                  |                             |           |           |                          |                      |               |               |
|          | <i>E. absuriae</i>                   |               |                  |                             |           |           |                          |                      | 1             |               |
|          | <i>E. cancerogenus</i>               |               |                  | 1                           |           |           |                          |                      |               |               |
|          | <i>E. cloacae</i>                    |               |                  |                             |           |           |                          | 1                    |               |               |
|          | <i>E. hormaechei</i>                 |               |                  | 1                           |           |           |                          |                      |               |               |
|          | <i>E. ludwigii</i>                   | 1             |                  |                             |           |           |                          |                      |               |               |
|          | <i>Erwinia chrysantemi</i>           |               | 1                |                             |           |           |                          |                      |               |               |
|          | <i>Er. piriflorigrans</i>            |               |                  |                             |           |           | 1                        |                      |               |               |
|          | <i>Escherichia hermannii</i>         |               |                  |                             | 1         |           |                          |                      |               |               |
|          | <i>E. vulneris</i>                   |               |                  | 1                           |           |           |                          | 1                    |               |               |
|          | <i>Klebsiella oxytoca</i>            |               |                  | 1                           |           |           |                          |                      |               |               |
|          | <i>Leclercia adecarboxylata</i>      | 1             |                  |                             |           |           |                          |                      |               |               |
|          | <i>Pantoea spp.</i>                  |               |                  |                             |           |           |                          |                      | 2             |               |
|          | <i>Pantoea agglomerans</i>           |               |                  |                             |           | 1         |                          |                      |               |               |
|          | <i>Raoultella terrigena</i>          | 1             |                  | 1                           |           |           |                          |                      |               |               |
|          | <i>R. terrigena</i>                  |               |                  | 1                           |           |           |                          |                      |               |               |
|          | <i>Serratia ficaria</i>              | 3             |                  |                             |           |           |                          |                      |               |               |
| Harvest  | <i>Cronobacter sakazakii</i>         |               | 1                |                             |           |           |                          |                      |               |               |
|          | <i>E. absuriae</i>                   |               | 1                |                             |           |           |                          |                      |               |               |
|          | <i>E. cloacae</i>                    |               |                  | 1                           |           |           |                          |                      |               |               |
|          | <i>E. hormaechei</i>                 |               |                  |                             | 1         |           |                          |                      |               |               |
|          | <i>E. coli</i>                       |               | 2                |                             |           |           |                          |                      |               | 1             |
|          | <i>K. oxytoca</i>                    |               | 1                | 1                           |           |           |                          |                      |               |               |
|          | <i>Kluyvera ascorbata</i>            |               |                  |                             |           |           |                          |                      |               | 1             |
|          | <i>Pseudomonas protegens</i>         |               |                  |                             |           |           |                          |                      | 1             |               |
|          | <i>S. marcescens</i>                 |               | 1                |                             |           |           |                          |                      |               |               |

**Table S2.** DNA sequencing results of bacteria not belonging to the lactic acid bacteria group during spring, véraison and harvest.

| Season   | Species                 | Soil<br>vineyard | Insects in the<br>vineyard | Tree bark close<br>to vineyard | Vine<br>leaf | Sound berry |
|----------|-------------------------|------------------|----------------------------|--------------------------------|--------------|-------------|
| Spring   | <i>Bacillus</i> spp.    |                  |                            | 1                              |              |             |
|          | <i>B. cereus</i>        |                  |                            | 1                              |              |             |
| Véraison | <i>B. cereus</i>        | 1                |                            |                                |              |             |
|          | <i>B. thuringiensis</i> | 1                |                            |                                |              |             |
|          | <i>B. megaterium</i>    |                  |                            |                                | 1            |             |
| Harvest  | <i>Bacillus</i> spp.    |                  | 1                          |                                |              |             |
|          | <i>B. nealsonii</i>     |                  |                            |                                | 1            |             |
|          | <i>B. subtilis</i>      |                  |                            |                                |              | 1           |
